# Supplementary material for: Functional noble metal nanostructures involving pyrene-conjugated-hyaluronan stabilised reduced graphene oxide
Source: Royal Society of Chemistry journal article supplement (doi:10.1039/c3ra45037f), 2013-01-01
Supplement: c3ra45037f.pdf [file c3ra45037f.pdf]

# **Functional noble metal nanostructures involving pyrene-conjugated-hyaluronan stabilised reduced graphene oxide**

Fei Zhang,<sup>a,b</sup> Faizah Md Yasin,<sup>c</sup> Xianjue Chen,<sup>c</sup> Jingxin Mo,<sup>c</sup> Colin L.

Raston\*<sup>b</sup> and Hongbin Zhang\*<sup>a</sup>

a Department of Polymer Science and Engineering, School of Chemistry and Chemical Engineering, Shanghai Jiao Tong University, Shanghai 200240, China. E-mail: hbzhang@sjtu.edu.cn; Tel: +86 21 54745005;

b Centre for NanoScale Science and Technology, School of Chemical and Physical Sciences, Flinders University, Bedford Park SA 5042, Australia. E-mail: colin.raston@flinders.edu.au; Tel: +61 88201 7958

c Centre for Strategic Nano-Fabrication, School of Chemistry and Biochemistry, The University of Western Australia, Crawley, WA 6009, Australia

S1

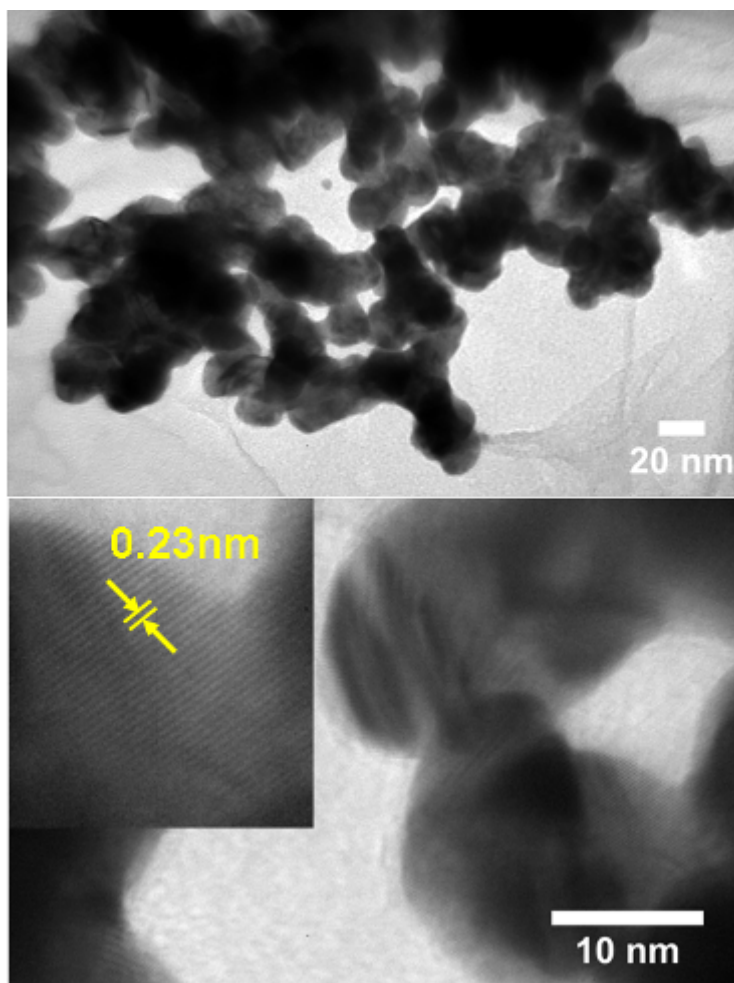

Figure S1: (A) TEM and (B) HRTEM images of Au<sub>2</sub>-Py-HA-RGO.

S2

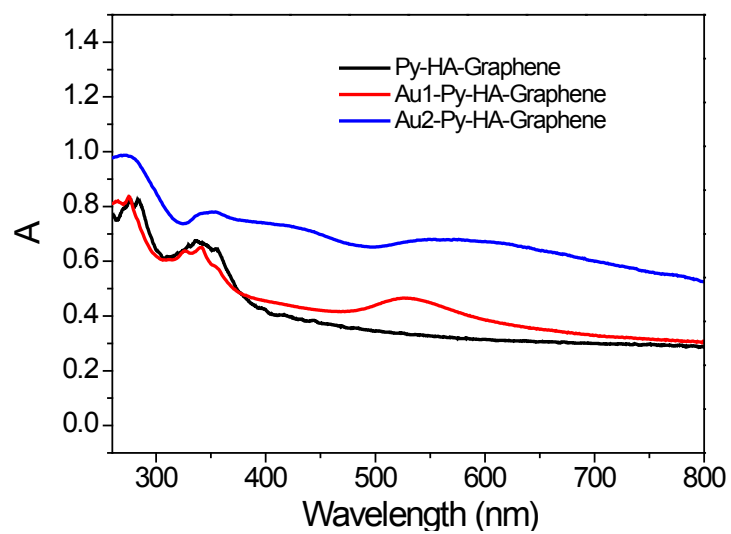

Figure S2: UV-Vis spectra for Py-HA-RGO, Au1-Py-HA-RGO, and Au2-Py-HA-RGO.

S3

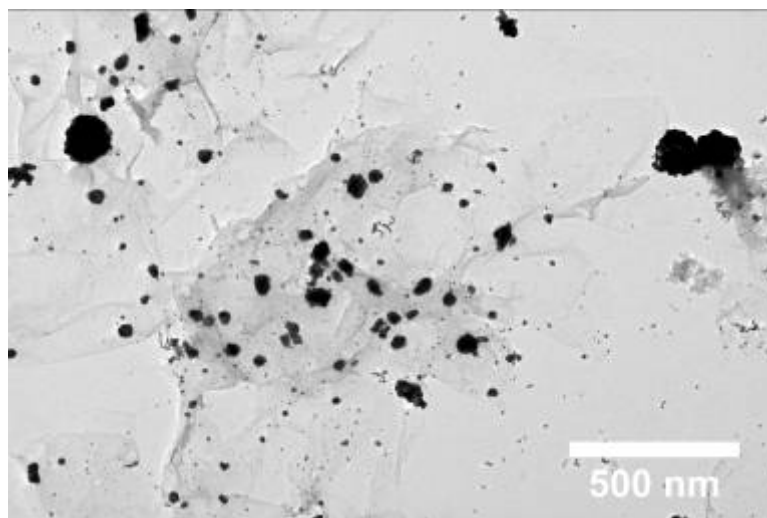

Figure S3: TEM image of the product after UV irradiation of a mixture of RGO and  $\text{HAuCl}_4$  (0.02 mM) at pH 12 for 2 hours (wavelength 255 nm).

S4

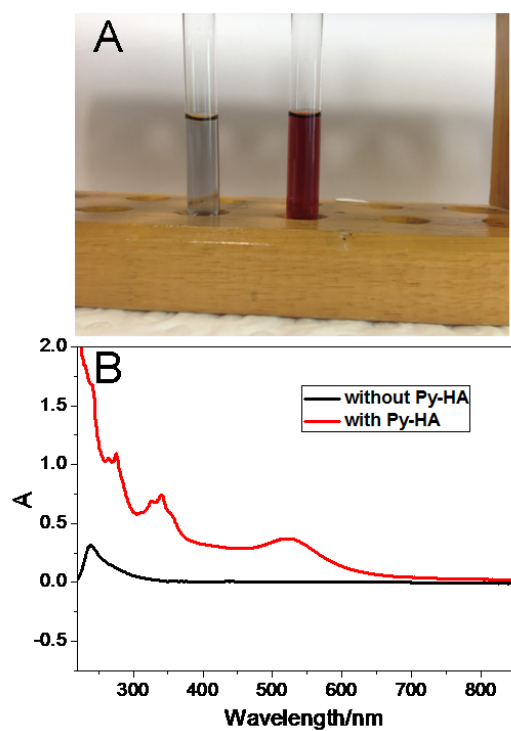

Figure S4: Samples (A) and UV-Vis spectra (B) of 0.02 mM  $\text{HAuCl}_4$  solution at pH 12 in the presence or absence of Py-HA (1 mg/mL) after UV irradiation (right sample) for 2 hours (wavelength 255 nm).

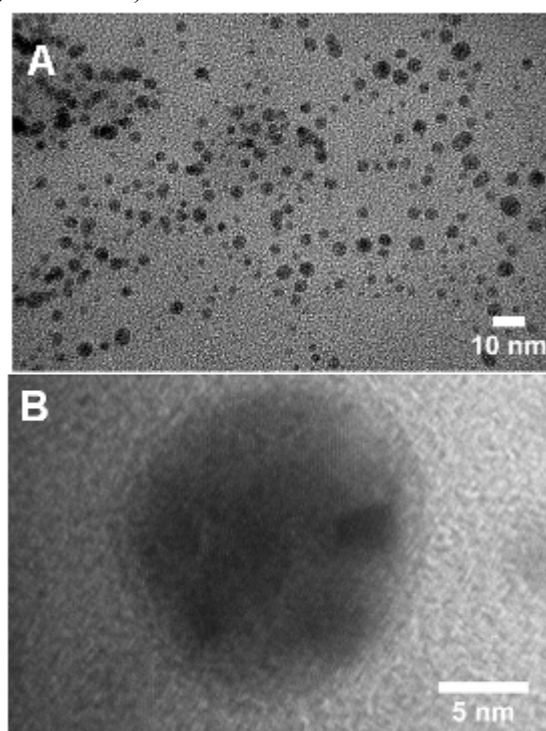

Figure S5: TEM images of the product formed using 0.02 mM  $\text{HAuCl}_4$  solution at pH 12 in the presence of Py-HA (1 mg/mL) after UV irradiation for 2 hours (wavelength

255 nm).

The experiments were as follows.  $\text{HAuCl}_4$  was added to the solution with or without Py-HA. The pH of the solutions (0.02 mM  $\text{HAuCl}_4$  with or without 1 mg/mL Py-H) were adjusted to pH 12, and then irradiated by UV light with the wavelength at 255 nm for 2 hour. The final solutions are shown in Figure S4. The solution with Py-HA changed from colourless to pink, indicating the formation of gold nanoparticles. The solution without Py-HA became slightly darkened, which may due to small amounts of large gold particles reduced from  $\text{HAuCl}_4$  under UV irradiation. In addition, the UV-Vis spectra of these solutions show dramatically different features, beyond the characteristic absorption band at around 520 nm for surface plasmon vibration for gold nanoparticles.<sup>1</sup> The absorption from 250 to 400 nm is attributed to the pyrene moiety of Py-HA. Without Py-HA, there was only one band at ca. 240 nm, reflecting the absorption of  $\text{Au}^{3+}$  species.<sup>2</sup> Figure S5 shows the gold nanoparticles < 10 nm obtained from 0.02 mM  $\text{HAuCl}_4$  solution at pH 12 in the presence of Py-HA (1 mg/mL) after UV irradiation (wavelength 255 nm) for 2 hours. The shape and size of the nanoparticles is consistent with that of Au1-Py-HA-RGO. The results show the role of Py-HA in promoting the photoreduction of the Au(III) precursor, and stabilizing the resulting Au nanoparticles, as for earlier reports on the utility of HA itself.<sup>1,2</sup>

S5

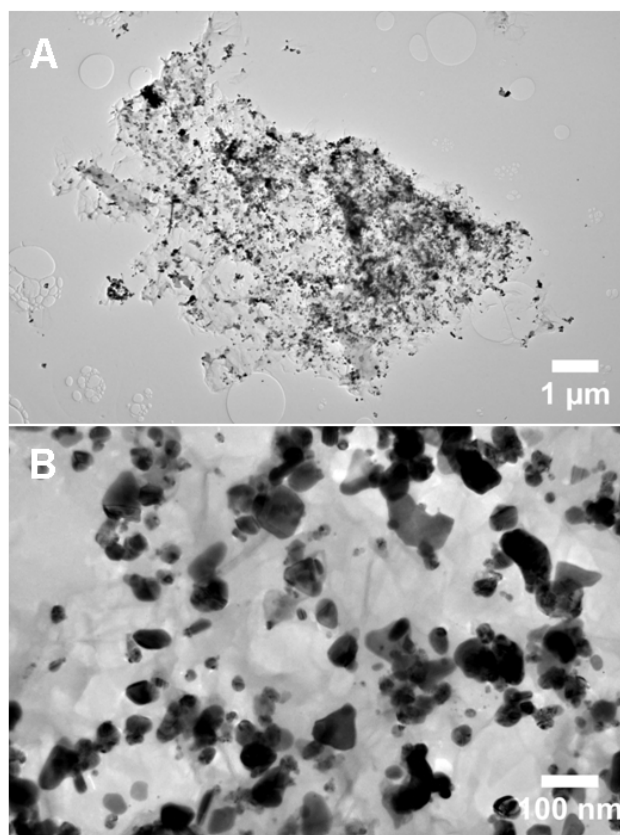

Figure S6: TEM images of Py-HA-RGO sheet decorated with Ag nanostructure (A and B)

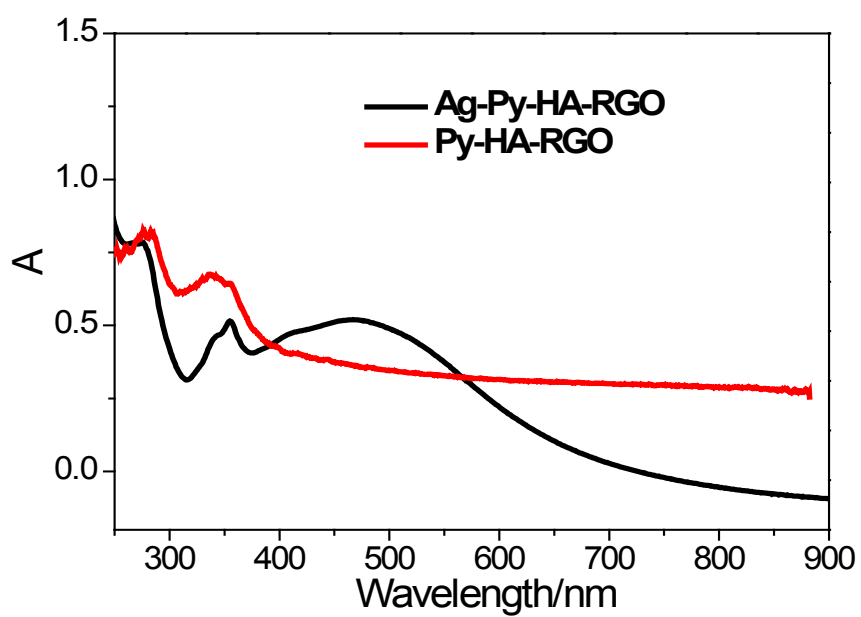

Figure S7: UV-Vis spectra for Py-HA-RGO decorated with Ag nanostructures.

S6

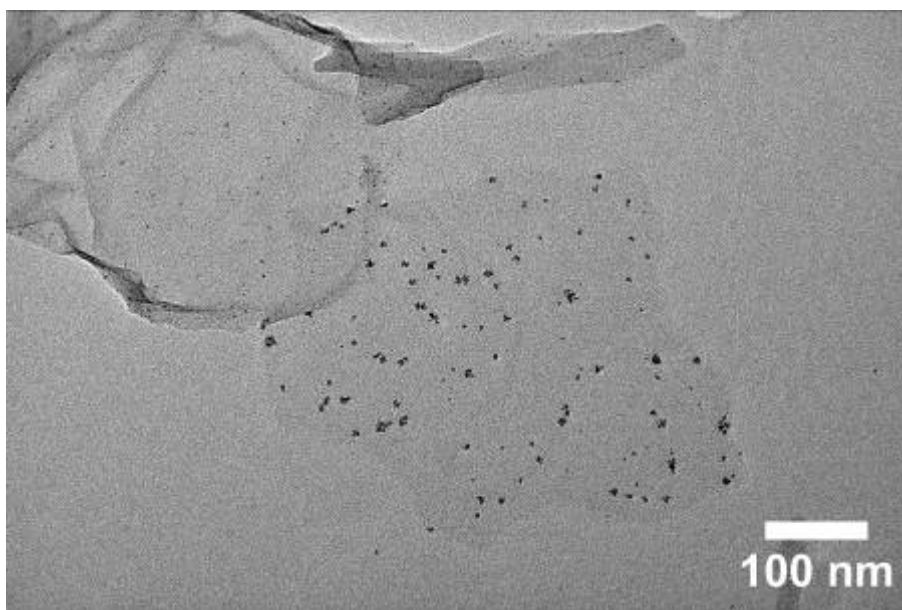

Figure S8: TEM image of the composite material formed after bubbling hydrogen gas through a mixture of RGO and  $\text{H}_2\text{PdCl}_4$  (0.2 mM) for 20 minutes.



S7

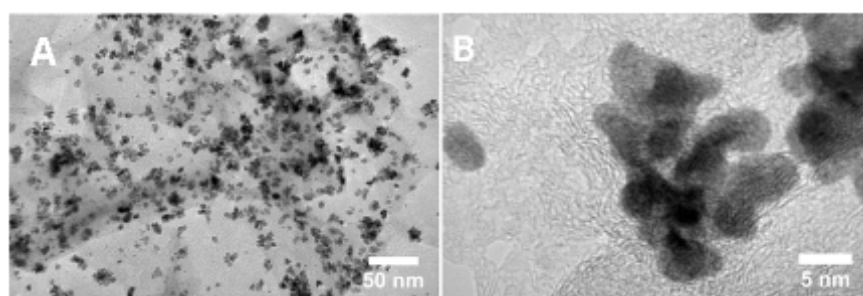

Figure S9: TEM images of Py-HA-RGO sheets decorated with Pt nanostructures.

S8

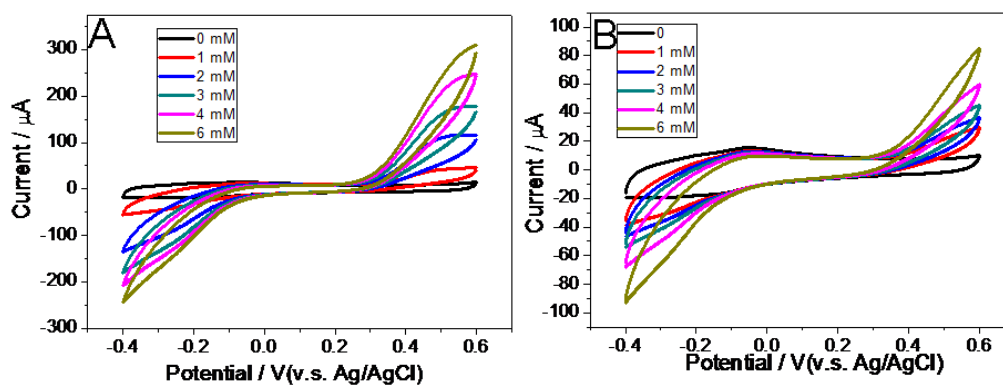

Figure S10: Cyclic voltammograms of the as-prepared Au1-Py-HA-RGO (A) and Au2-Py-HA-RGO (B)-modified GCEs in  $N_2$ -saturated 0.1 M PBS (pH 7.0) with different concentrations (0, 1, 2, 3, 4, 6) mM of  $H_2O_2$ . Scan rate: 50 mV/s.

S9 Linear regression equations of modified GCEs for amperometric response for H<sub>2</sub>O<sub>2</sub>

**Rang from 0.5 to 50 μM for H<sub>2</sub>O<sub>2</sub> concentration**

Au1-Py-RGO/GCE:

$$I(\mu A) = 0.12 C_{H_2O_2} (\mu M) + 0.2 \quad (\text{Correlation coefficient: } 0.998)$$

Au2-Py-RGO/GCE:

$$I(\mu A) = 0.072 C_{H_2O_2} (\mu M) + 0.24 \quad (\text{Correlation coefficient: } 0.998)$$

**Rang from 50 to 50000 μM for H<sub>2</sub>O<sub>2</sub> concentration**

Au1-Py-RGO/GCE:

$$I(\mu A) = 0.038 C_{H_2O_2} (\mu M) + 4.49 \quad (\text{Correlation coefficient: } 0.997)$$

Au2-Py-RGO/GCE:

$$I(\mu A) = 0.0078 C_{H_2O_2} (\mu M) + 3.27 \quad (\text{Correlation coefficient: } 0.998)$$

## S10 Comparison of the performance of the prototype H<sub>2</sub>O<sub>2</sub> biosensor.

Table S1 Comparison of the performance of the prototype H<sub>2</sub>O<sub>2</sub> biosensor relative to those of other enzymatic and non-enzymatic biosensors

| Electrode                       | Respond time(s) | Linear range( $\mu$ M) | Stability <sup>a</sup> | Reference  |
|---------------------------------|-----------------|------------------------|------------------------|------------|
| Hb/Graphene-Chitosan Film/GCE   | Within 5        | 6.5-230                | 80.1% for 14 days      | 3          |
| Mb/GNs-Nafion/ GCE              | Within 5        | 1.5-90                 | 93% for 50 days        | 4          |
| HRP/Polyion Cmplx Membrane /GCE | Within 15       | 0.5-10                 | 80% for 30 days        | 5          |
| Hb/Titania Sol-gel Film/GCE     | Within 5        | 0.5-54                 | 89% for 80 days        | 6          |
| GNs/silicon Sol-gel/GCE         | Within 5        | 2.5-45                 | Stable for one week    | 7          |
| GNs/GO/GCE                      | Within 6        | 0.5-50                 | NA                     | 8          |
| Au1-Py-HA-RGO/GCE               | Within 4        | 0.5-5000               | 95% for 30 days        | This paper |

GNs: Gold nanoparticles; Mb: myoglobin; GO: graphene oxide; Hb: Hemoglobin;  
HRP: horseradish peroxidase

a: Stability defined as the percent of retaining the initial current response of the biosensor stored in PBS at 4 °C for some days.

## References

1. M. M. Kemp, A. Kumar, S. Mousa, T.-J. Park, P. Ajayan, N. Kubotera, S. A. Mousa and R. J. Linhardt, *Biomacromolecules*, 2009, **10**, 589-595.
2. N. Q. Hien, D. Van Phu, N. N. Duy and L. A. Quoc, *Carbohydr. Polym.*, 2012, **89**, 537-541.
3. H. Xu, H. Dai and G. Chen, *Talanta*, 2010, **81**, 334-338.
4. W. Yang, Y. Li, Y. Bai and C. Sun, *Sens. Actuators, B*, 2006, **115**, 42-48.

5. S. Yabuki, F. Mizutani and Y. Hirata, *Sens. Actuators, B*, 2000, **65**, 49-51.
6. J. Yu and H. Ju, *Anal. Chim. Acta*, 2003, **486**, 209-216.
7. G. Maduraiveeran and R. Ramaraj, *J. Electroanal. Chem.*, 2007, **608**, 52-58.
8. Y. Fang, S. Guo, C. Zhu, Y. Zhai and E. Wang, *Langmuir*, 2010, **26**, 11277-11282.
